# Supplementary material for: From pairs of most similar sequences to phylogenetic best matches
Source: Springer Nature journal article supplement (doi:10.1186/s13015-020-00165-2), 2020-04-09
Supplement: 13015_2020_165_MOESM1_ESM.pdf [file 13015_2020_165_MOESM1_ESM.pdf]

From pairs of most similar sequences to phylogenetic best matches

## Additional Figures

Peter F. Stadler, Manuela Geiß, David Schaller, Alitzel López Sánchez, Marcos González Laffitte, Dulce I. Valdivia, Marc Hellmuth, Maribel Hernández Rosales

April 6, 2020

# Example of simulated scenario

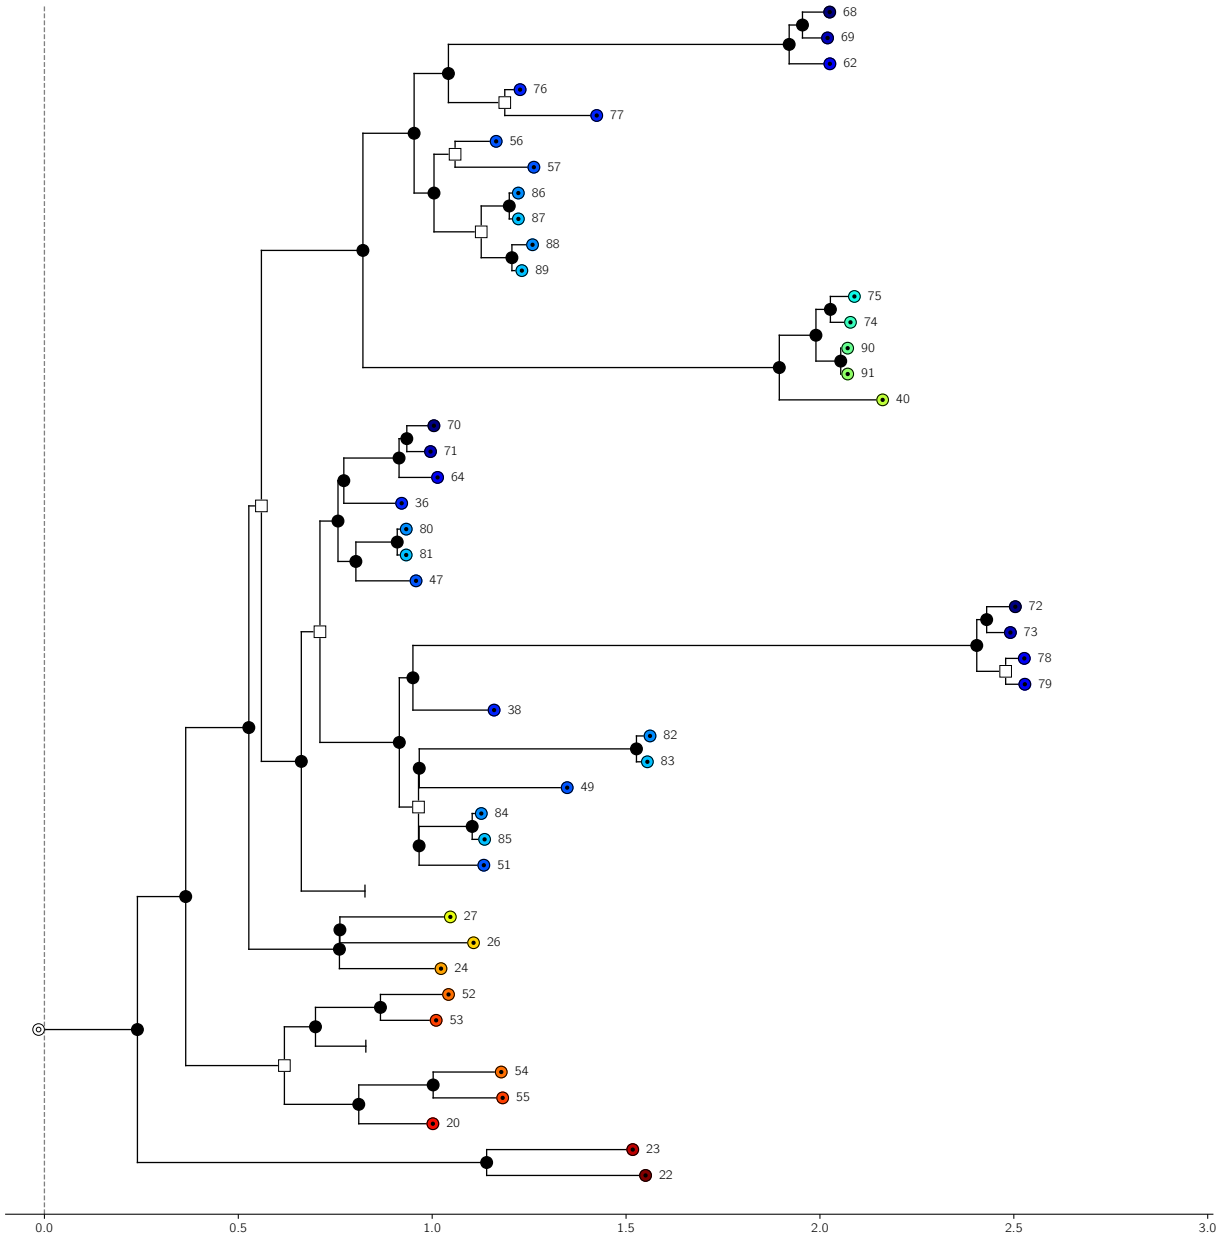

Figure S1: Example gene tree (*simID.4*) with 44 surviving leaves in 20 different species (color-coded).

## Statistical properties of the 2000 simulated scenarios

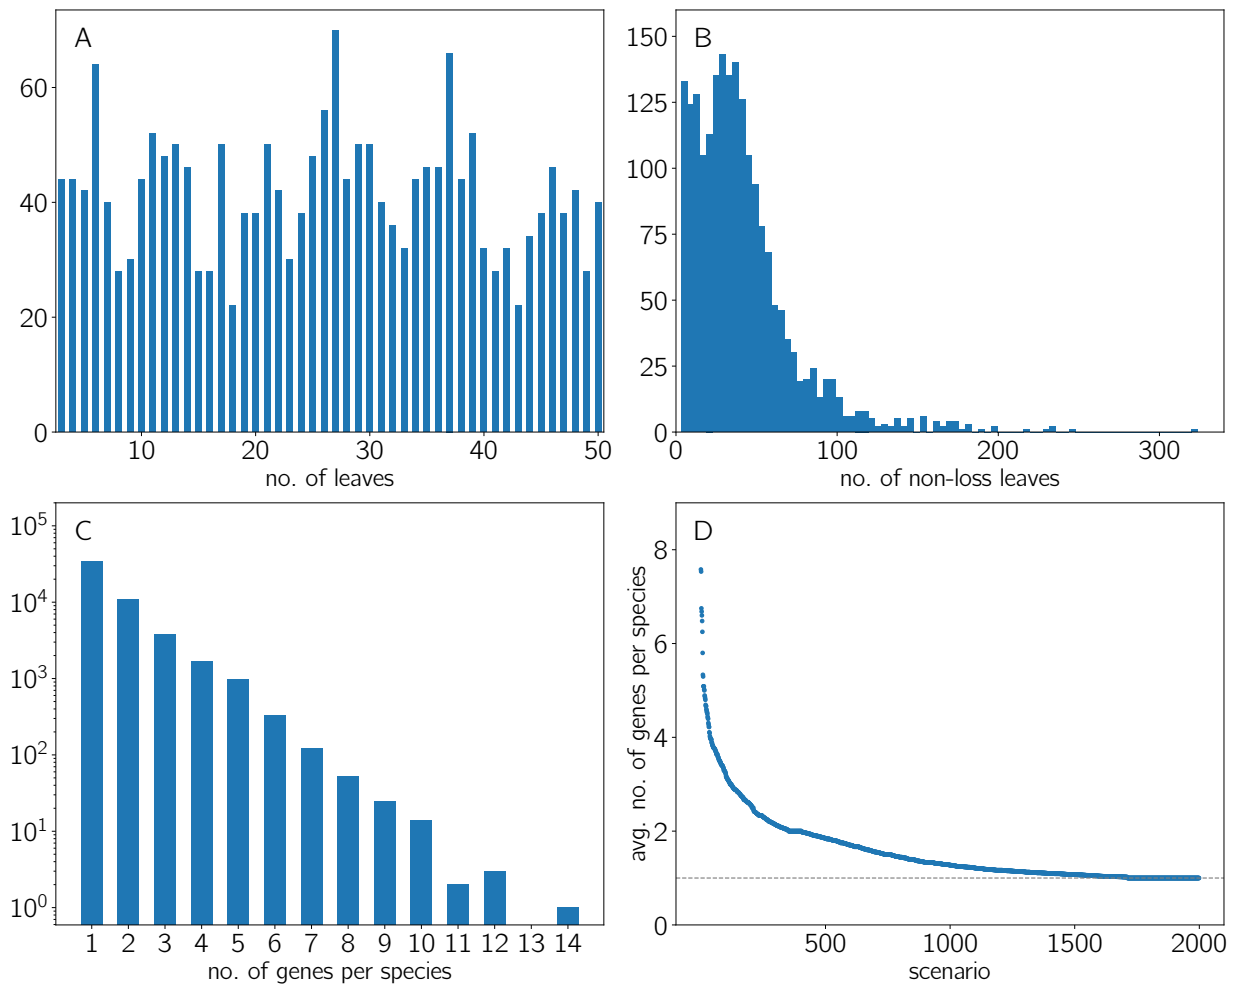

Figure S2: Distribution of the number of leaves in the set of 2000 simulated scenarios: (A) species trees (barplot), (B) (observable part of the) gene trees (histogram, 80 bins), (C) number of genes per species in the whole data set (barplot, log-scale), and (D) average number of genes per species per scenario (in descending order).

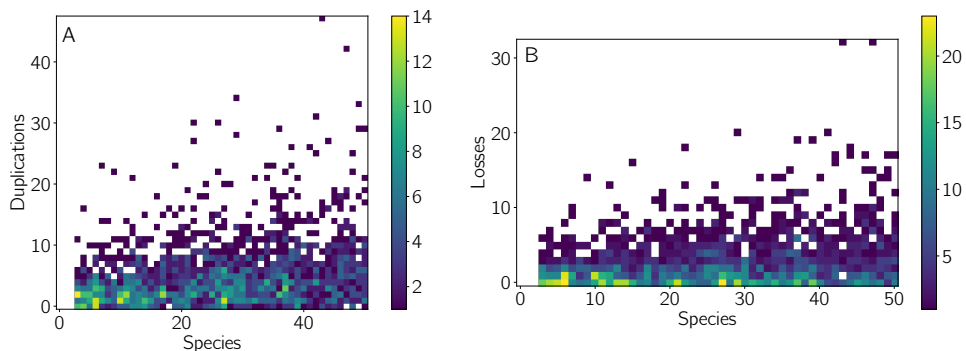

Figure S3: Distribution of the number of (A) leaves in the species tree and duplication events, and (B) leaves in the species tree and loss events as color-coded 2-dimensional histograms.

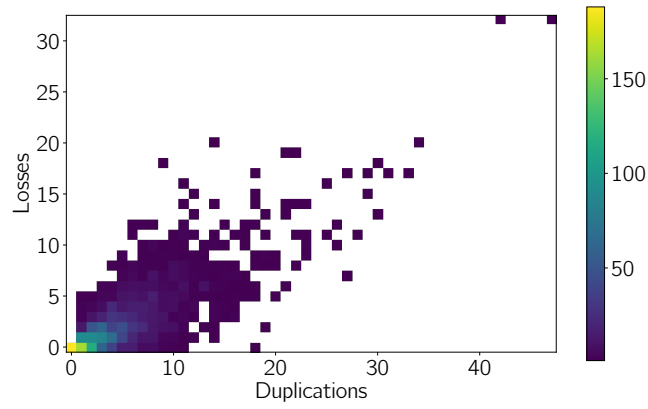

Figure S4: Distribution of the number of duplication and loss events as a color-coded 2-dimensional histogram.

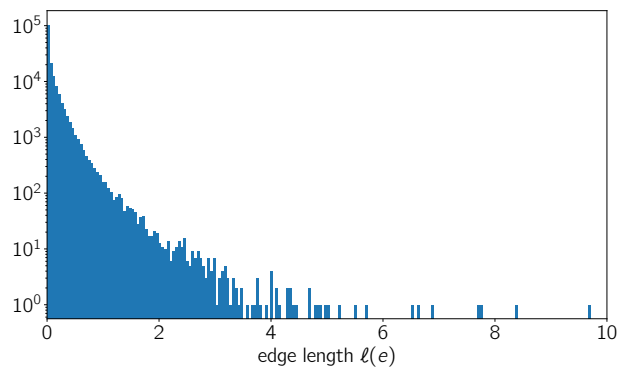

Figure S5: Distribution of the edge lengths in the simulated gene trees (histogram, 200 equal-sized bins, log-scale).

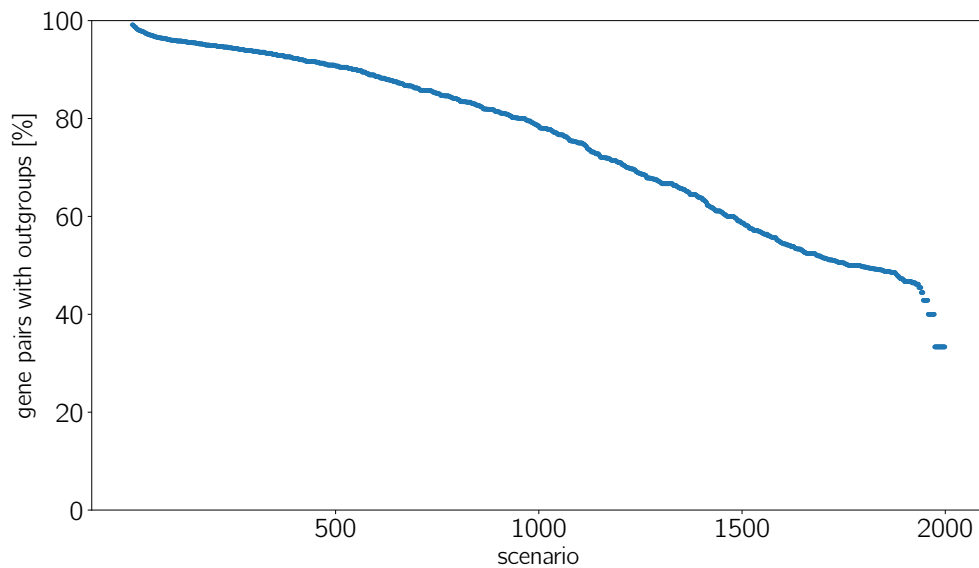

Figure S6: Percentage of gene pairs for with outgroup genes could be found (based on the heuristic that uses outgroup species) among all  $n(n - 1)/2$  gene pairs per scenario, where  $n$  is the number of non-loss leaves. These gene pairs with available outgroups were used to calculate recall and precision for the comparison of the best match inference methods.

## Additional results

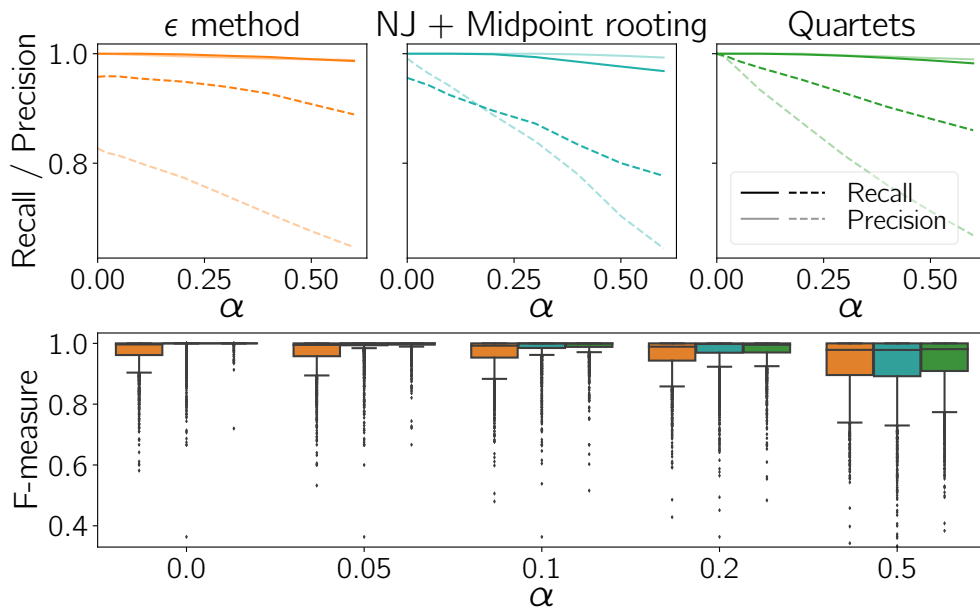

Figure S7: Performance comparison of the best match inference from distance data for simulated data (2000 scenarios) and biased noise. Top panel: Median (solid) and 10<sup>th</sup> percentile (dashed) of recall and precision as a function of noise level  $\alpha$ , i.e., the contribution of an additive disturbance matrix  $\mathbf{D}'$  that was built from another tree. For each gene tree and noise level, the final distance matrix was computed as  $(1 - \alpha)\mathbf{D} + \alpha\mathbf{D}'$  (see Simulation of measurement noise section). Lower panel: Boxplots of F-measure for different levels of noise superimposed on the additive distance;  $\alpha = 0$  refers to perfect data. Orange:  $\epsilon$  method, turquoise: explicit construction of the unrooted tree  $\bar{T}$  and midpoint rooting, green: inference of quartets with outgroups chosen in another branch of the root.

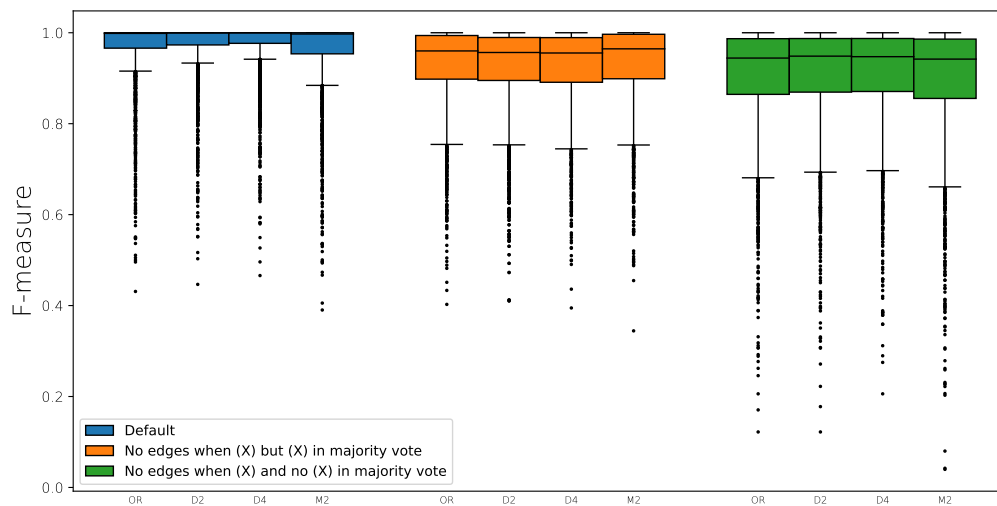

Figure S8: Alternative construction of  $\Gamma$ . In order to further investigate the inaccuracies introduced by unresolved quartets, we considered alternative constructions of the auxiliary graph  $\Gamma$ . In addition to the default method, we omitted all edges defined for quartets classified as unresolved ( $\times$ ), and we ignored the contribution of outgroups that lead to unresolved and used a majority vote only for the remaining choices of the outgroup. All non-trivial sinks in  $\Gamma$  were then interpreted as best matches, i.e., isolated vertices in  $\Gamma$  were ignored. Both variants perform worse than the default method. Data are compared for short nucleic acid sequences with rates of sequence divergence scaled by 1 (OR), 1/2 (D2), 1/4 (D4), and 2 (M2).

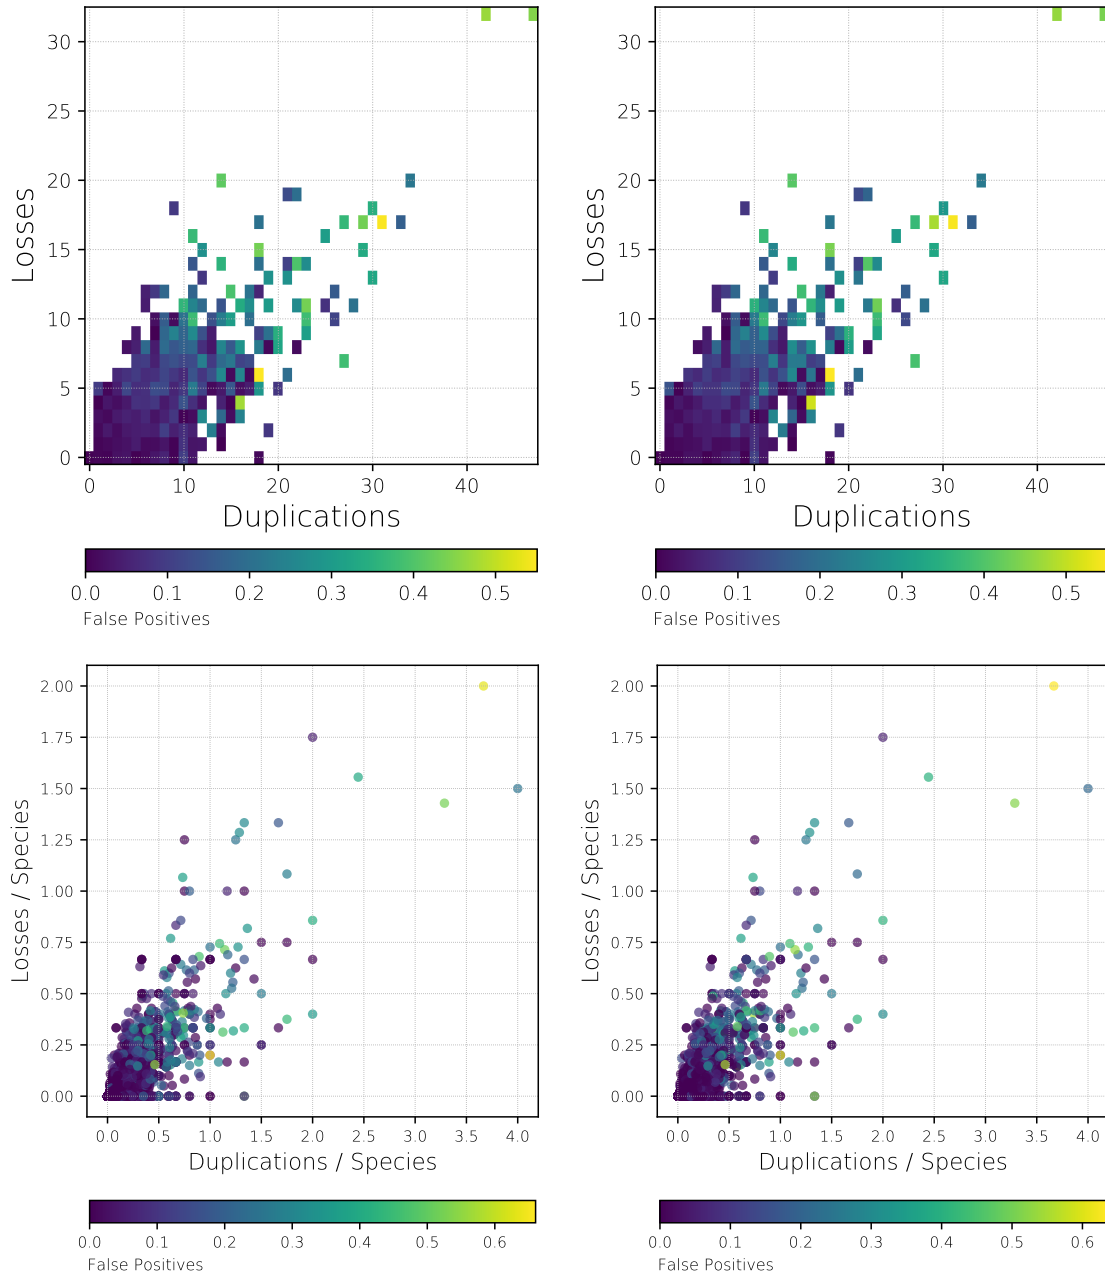

Figure S9: Inference of best matches from simulated sequence data. Heat map of the fraction of false positive best matches inferred by Quartet Mapping as a function of the number of duplication and loss events in the simulated scenario. Upper panels: absolute number of events; lower panel: number of events normalized by the number of species. Left panels: 200 nt sequences; right panels: 2000 nt sequences.

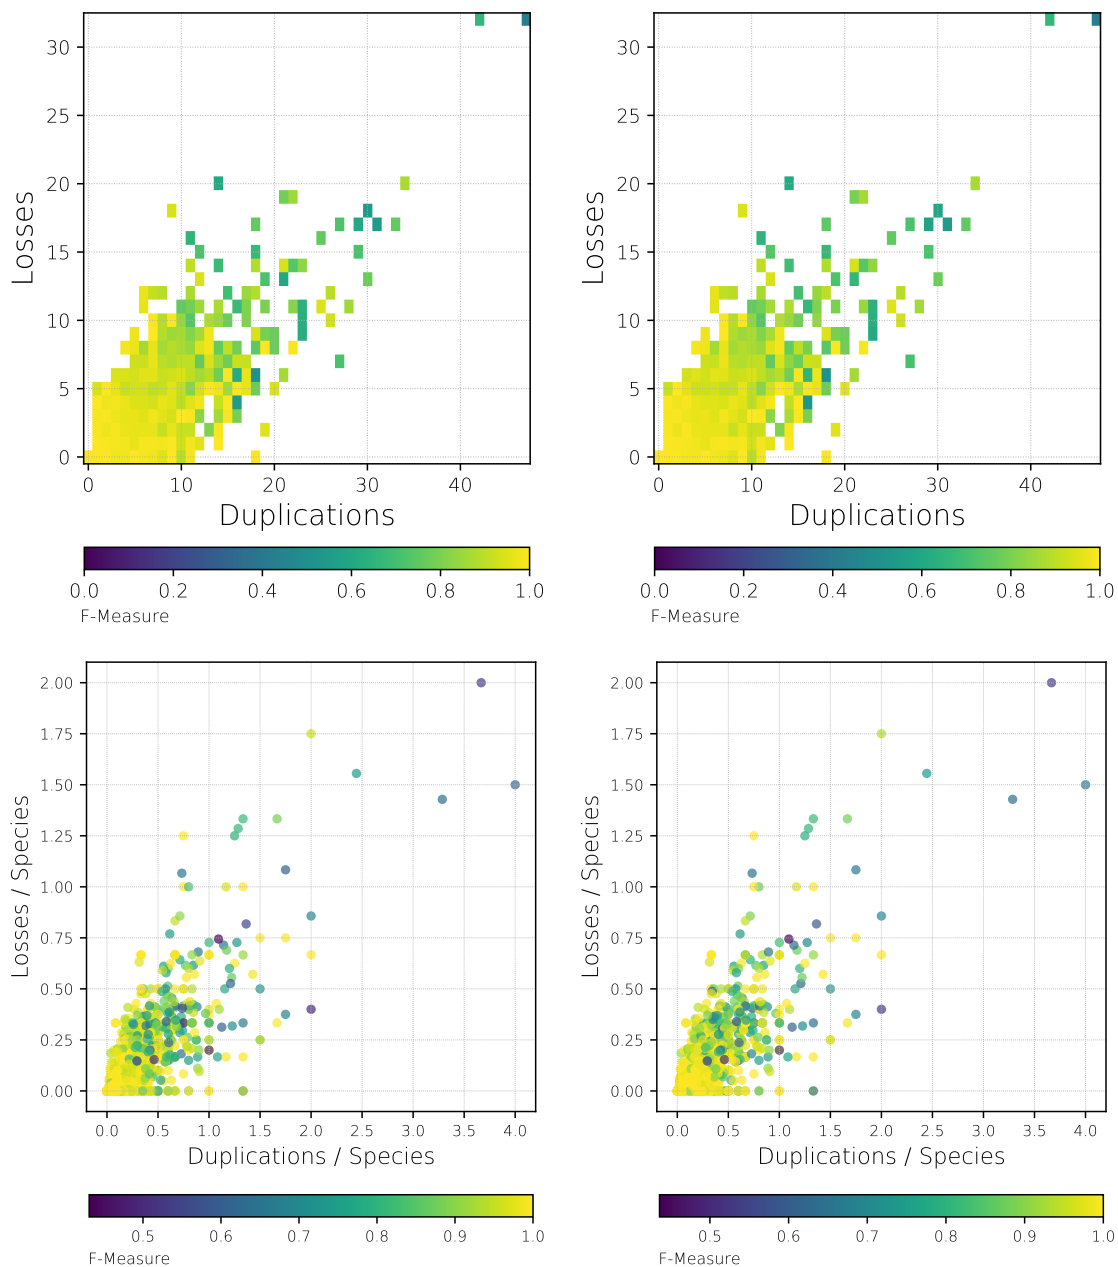

Figure S10: Inference of best matches from simulated sequence data. Heat map of the F-measure obtained using Quartet Mapping as a function of the number of duplication and loss events in the simulated scenario. Upper panels: absolute number of events; lower panel: number of events normalized by the number of species. Left panels: 200 nt sequences; right panels: 2000 nt sequences.
